# Supplementary material for: Carbon Fiber Paper Sensor for Determination of Trimethoprim Antibiotic in Fish Samples
Source: MDPI journal article supplement (doi:10.3390/s23073560), 2023-03-29
Supplement: s1 [file s1]

## **Supplementary material**

### **Carbon fiber paper sensor for Determination of trimethoprim antibiotic in fish samples**

Álvaro Torrinha, Miguel Tavares, Vitória Dibo, Cristina Delerue-Matos, Simone Morais\*

REQUIMTE-LAQV, Instituto Superior de Engenharia do Porto, Instituto Politécnico do Porto,  
Rua Dr. António Bernardino de Almeida, 431, 4249-015 Porto, Portugal

Corresponding author:

\*sbm@isep.ipp.pt (Simone Morais)

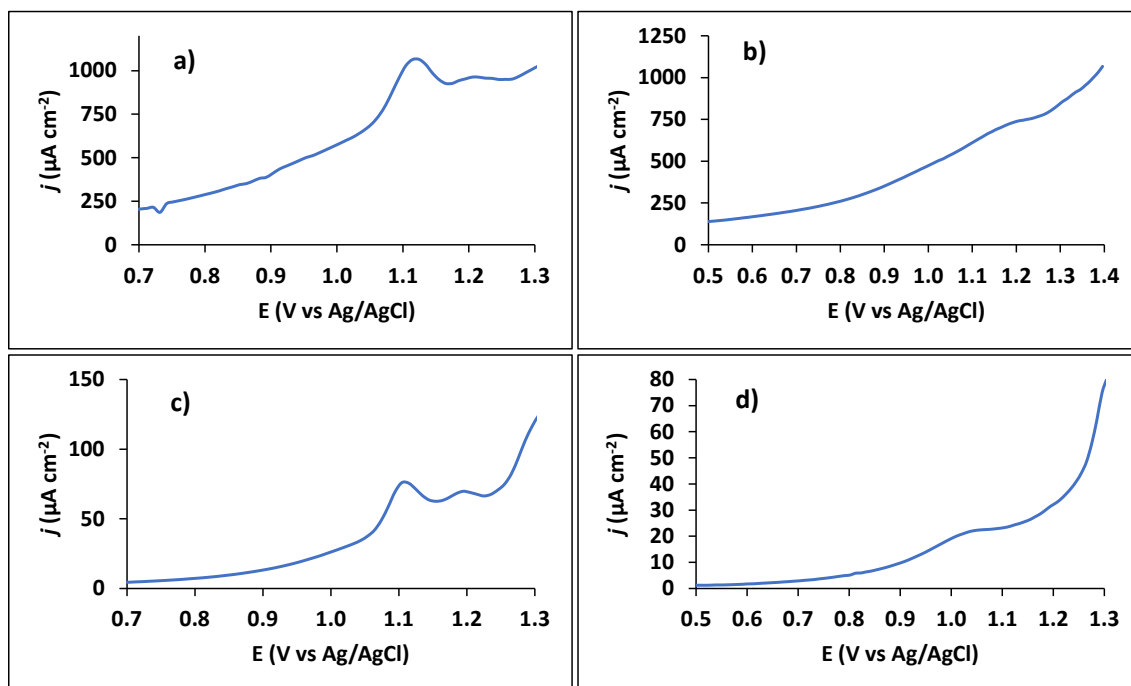

Figure S1 – Comparison between SWV and DPV detection techniques. a) DPV of 10  $\mu\text{M}$  trimethoprim. b) DPV of 0.1  $\mu\text{M}$  trimethoprim. c) SWV of 10  $\mu\text{M}$  trimethoprim. d) SWV of 0.1  $\mu\text{M}$  trimethoprim.

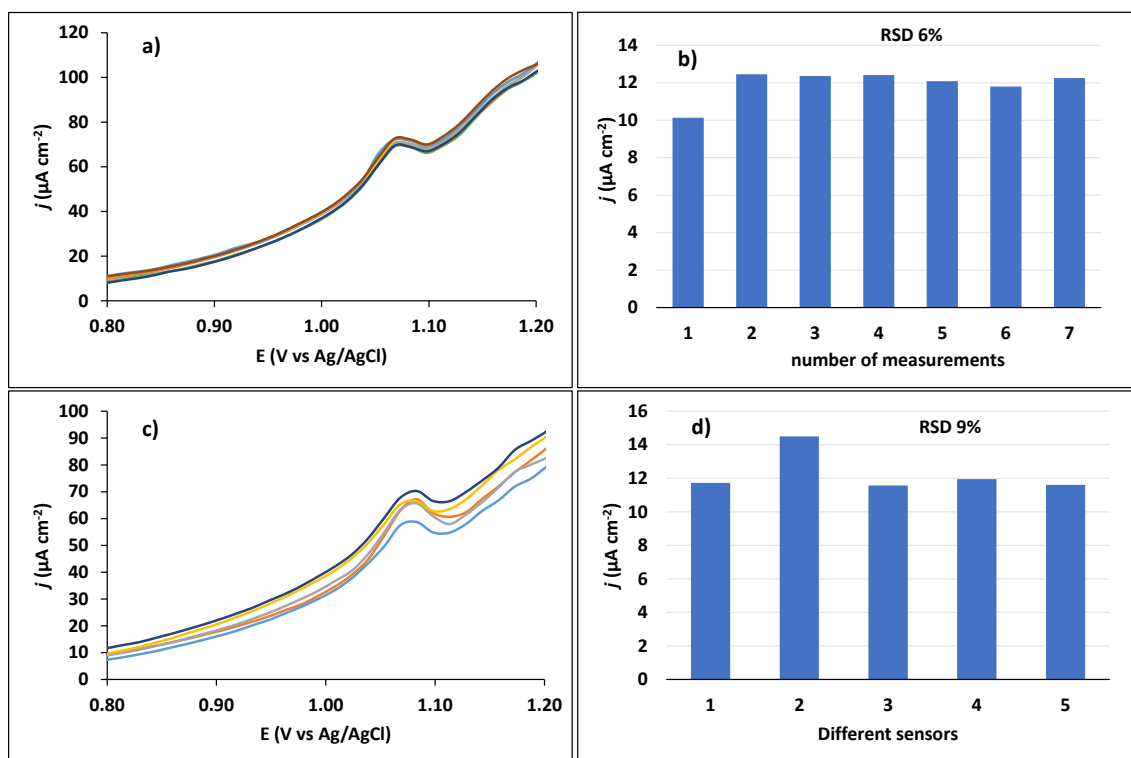

Figure S2 – Repeatability and reproducibility of CPS sensor for 0.1  $\mu\text{M}$  trimethoprim in optimized conditions. a) Seven different SWV measurements using the same sensor to assess repeatability. b) Comparison between peak height of the 7 measurements. c) SWV measurements of 5 different CPS to assess reproducibility. d) Comparison between peak height of the 5 different CPS.

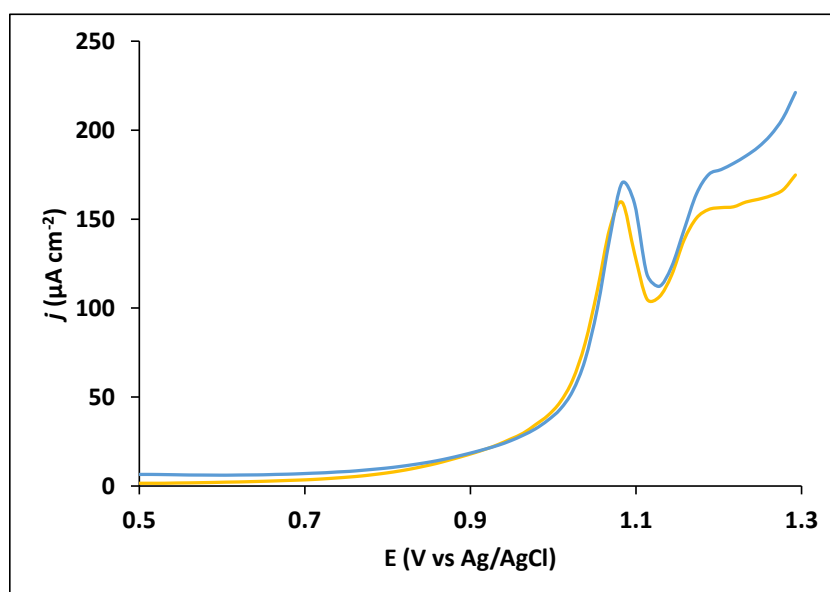

Figure S3 – Selectivity studies performed by SWV for a trimethoprim (yellow line) concentration of 5  $\mu\text{M}$  in optimized analytical conditions and for trimethoprim mixed with different compounds (ascorbic acid, glutamic acid, glucose, lactose, sodium sulphate and calcium carbonate) in a 1:500 concentration ratio (blue line).

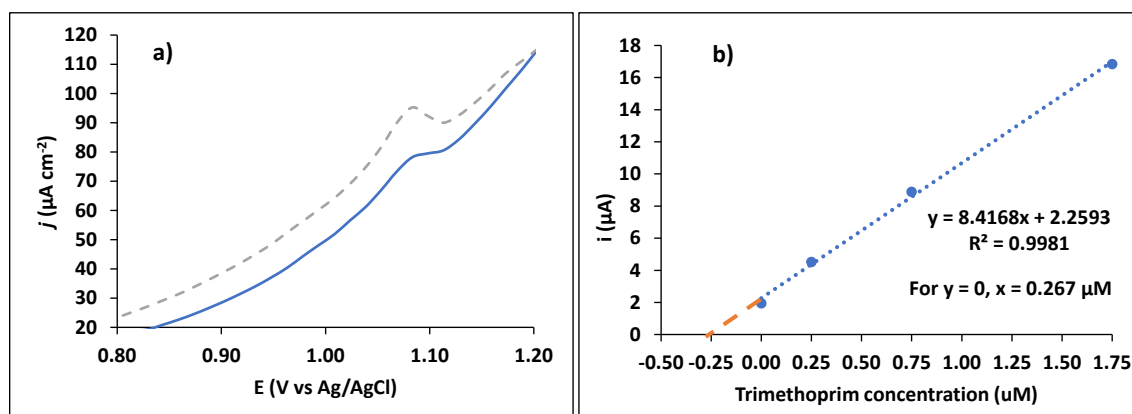

Figure S4 – Analysis of fish extract. a) SWV comparing fish extract spiked with 0.25  $\mu\text{M}$  of trimethoprim (full line) with 0.25  $\mu\text{M}$  of trimethoprim in electrolyte solution (trace line). b) Representative standard addition plot of the analysis of an extract spiked with 0.25  $\mu\text{M}$  of trimethoprim.
